# Supplementary material for: The Hair Growth‐Promoting Effect of Rumex japonicus Houtt. Extract
Source: Hindawi journal article supplement (doi:10.1155/2016/1873746), 2016-01-01
Supplement: f1 [file 1873746.f1.pdf]

**Vehicle**

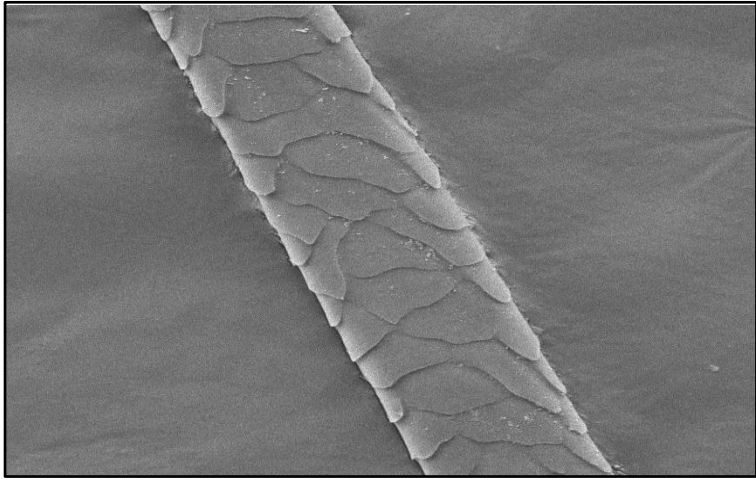

**RJ 4 mg/ml**

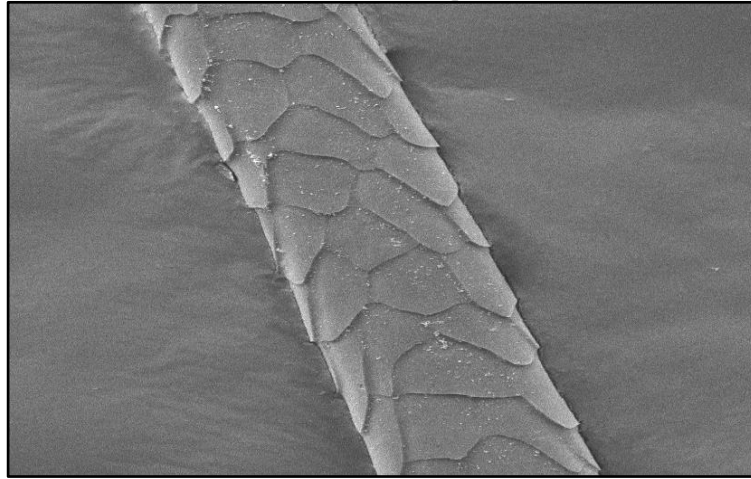

**RJ 8 mg/ml**

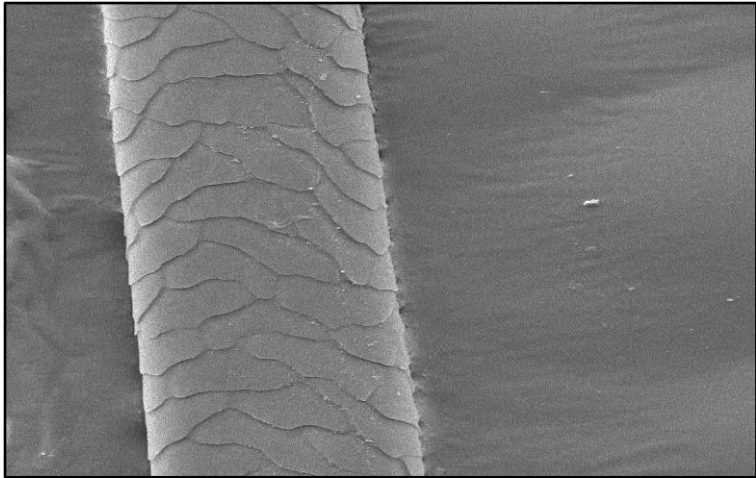

**5% Mi**

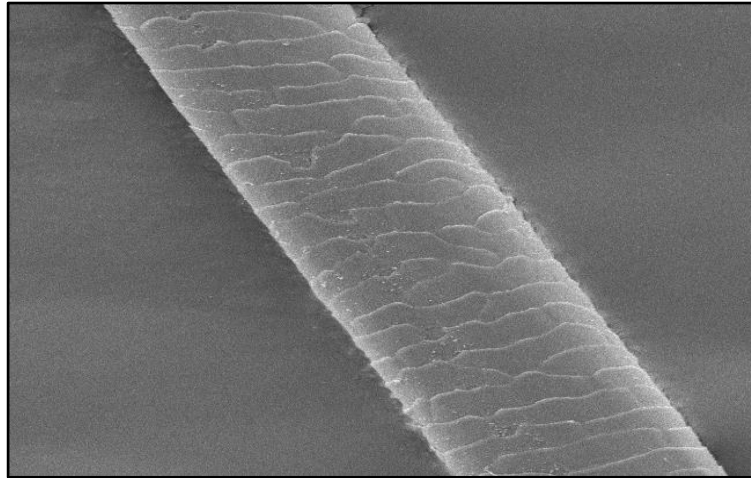

**Supplement Fig.1**
